# Supplementary material
Source: publisher figshare collection journal article supplement (https://diabetesjournals.figshare.com/articles/dataset/_/13607786)
Supplement: Supplementary file 1 [file 1]

## Checklist for Reporting Human Islet Preparations Used in Research

Adapted from Hart NJ, Powers AC (2018) Progress, challenges, and suggestions for using human islets to understand islet biology and human diabetes. *Diabetologia* <https://doi.org/10.1007/s00125-018-4772-2>.

|                                                                                                                                                                                                                                                                |                                                                                |
|----------------------------------------------------------------------------------------------------------------------------------------------------------------------------------------------------------------------------------------------------------------|--------------------------------------------------------------------------------|
| <b>Manuscript DOI:</b> <a href="https://doi.org/10.2337/[insert manuscript submission number]">https://doi.org/10.2337/[insert manuscript submission number]</a> (Example, <a href="https://doi.org/10.2337/db18-1234">https://doi.org/10.2337/db18-1234</a> ) |                                                                                |
| <b>Title:</b> Syntaxin 4 mediates NF- $\kappa$ B signaling and chemokine ligand expression <i>via</i> specific interaction with I $\kappa$ B $\beta$                                                                                                           |                                                                                |
| <b>Author list:</b> Rajakrishnan Veluthakal, Eunjin Oh, Miwon Ahn, Diti Chatterjee-Bhowmick, and Debbie C. Thurmond                                                                                                                                            |                                                                                |
| <b>Corresponding author:</b> Dr. Debbie C. Thurmond                                                                                                                                                                                                            | <b>Email address:</b> <a href="mailto:dthurmond@coh.org">dthurmond@coh.org</a> |

d

| Islet preparation              | 1            | 2            | 3            | 4            | 5            | 6            | 7 | 8 <sup>a</sup> |
|--------------------------------|--------------|--------------|--------------|--------------|--------------|--------------|---|----------------|
| <b>MANDATORY INFORMATION</b>   |              |              |              |              |              |              |   |                |
| Unique identifier              | SAMN11483342 | SAMN11514696 | SAMN12500521 | SAMN12924398 | SAMN13254972 | SAMN08768971 |   |                |
| Donor age (years)              | 52           | 59           | 52           | 38           | 60           | 61           |   |                |
| Donor sex (M/F)                | F            | F            | M            | M            | F            | M            |   |                |
| Donor BMI (kg/m <sup>2</sup> ) | 39.8         | 21.8         | 29.0         | 28.0         | 44.4         | 27           |   |                |

|                                                                             |                         |                     |                         |             |                         |                         |  |  |
|-----------------------------------------------------------------------------|-------------------------|---------------------|-------------------------|-------------|-------------------------|-------------------------|--|--|
| Donor HbA <sub>1c</sub> or other measure of blood glucose control           | 6.4                     | 5.2                 | 5.1                     | 5.4         | 5.6                     | 5.6                     |  |  |
| Origin/source of islets <sup>b</sup>                                        | IIDP                    | IIDP                | IIDP                    | IIDP        | IIDP                    | City of Hope Islet Core |  |  |
| Islet isolation centre                                                      | University of Wisconsin | University of Miami | University of Wisconsin | Scharp-Lacy | University of Wisconsin | SC-ICRC                 |  |  |
| Donor history of diabetes? Yes/No                                           | No                      | No                  | No                      | No          | No                      | No                      |  |  |
| <b>If Yes, complete the next two lines if this information is available</b> |                         |                     |                         |             |                         |                         |  |  |
| Diabetes duration (years)                                                   |                         |                     |                         |             |                         |                         |  |  |
| Glucose-lowering therapy at time of death <sup>c</sup>                      |                         |                     |                         |             |                         |                         |  |  |

| <b>RECOMMENDED INFORMATION</b> |                   |                         |                   |                   |             |  |  |  |
|--------------------------------|-------------------|-------------------------|-------------------|-------------------|-------------|--|--|--|
| Donor cause of death           | Anoxia            | Cerebrovascular /stroke | Head trauma       | Head trauma       | Head trauma |  |  |  |
| Warm ischaemia time (h)        | No data available | No data available       | No data available | No data available | 17 min      |  |  |  |
| Cold ischaemia time (h)        | 335 min           | 594 min                 | 493 min           | 528 min           | 374         |  |  |  |

|                                                                                   |                          |                          |                          |                          |                          |              |  |  |
|-----------------------------------------------------------------------------------|--------------------------|--------------------------|--------------------------|--------------------------|--------------------------|--------------|--|--|
| Estimated purity (%)                                                              | 92                       | 90                       | 95                       | 82                       | 95                       | 80           |  |  |
| Estimated viability (%)                                                           | 98                       | 88                       | 98                       | 95                       | 98                       | 80           |  |  |
| Total culture time (h) <sup>d</sup>                                               | 1 day 16 h               | 4 days 16 h              | 1 day 12 h               | 2 days 3 h               | 1 day 18 h               |              |  |  |
| Glucose-stimulated insulin secretion or other functional measurement <sup>e</sup> | IκBα/β Degradation assay | TMT analyses |  |  |
| Handpicked to purity? Yes/No                                                      | Yes                      | Yes                      | Yes                      | Yes                      | Yes                      | Yes          |  |  |
| Additional notes                                                                  |                          |                          |                          |                          |                          |              |  |  |

<sup>a</sup>If you have used more than eight islet preparations, please complete additional forms as necessary

<sup>b</sup>For example, IIDP, ECIT, Alberta IsletCore

<sup>c</sup>Please specify the therapy/therapies

<sup>d</sup>Time of islet culture at the isolation centre, during shipment and at the receiving laboratory

<sup>e</sup>Please specify the test and the results
